# Supplementary material for: Interfacial and bulk properties of concentrated solutions of ammonium nitrate
Source: Royal Society of Chemistry journal article supplement (doi:10.1039/d0cp04874g), 2020-01-01
Supplement: d0cp04874g1.pdf [file d0cp04874g1.pdf]

## Electronic Supplementary Information

### Interfacial and bulk properties of concentrated solutions of ammonium nitrate

Sara Mosallanejad<sup>a</sup>, Ibukun Oluwoye<sup>a</sup>, Mohammednoor Altarawneh<sup>b</sup>, Jeff Gore<sup>c</sup>, Bogdan Z.  
Dlugogorski<sup>d,\*</sup>

<sup>a</sup> Discipline of Chemistry and Physics, College of Science, Health, Engineering and  
Education, Murdoch University  
90 South Street, Murdoch, WA 6150, Australia

<sup>b</sup> Department of Chemical and Petroleum Engineering, United Arab Emirates University,  
Sheikh Khalifa bin Zayed Street, Al-Ain, 15551, United Arab Emirates

<sup>c</sup> Dyno Nobel Asia Pacific Pty Ltd, Mt Thorley, NSW 2330, Australia

<sup>d</sup> Energy and Resources Institute  
Charles Darwin University  
Casuarina Campus, Orange 12.3.49, Ellengowan Drive  
Northern Territory 0909, Australia

\*Corresponding author's email:

[bogdan.dlugogorski@cdu.edu.au](mailto:bogdan.dlugogorski@cdu.edu.au)

## Section I: Non-polarisable water models

**Table S1.** The molecular parameters for the three water models employed in the current study.

|                                                        | $\sigma$ (Å) | $\varepsilon$ (kJ mol <sup>-1</sup> ) | $q$ ( $ e $ )                       |
|--------------------------------------------------------|--------------|---------------------------------------|-------------------------------------|
| <b>SPC/E model<sup>1</sup></b>                         |              |                                       |                                     |
| O                                                      | 3.166        | 0.650                                 | -0.8476                             |
| H                                                      | 0            | 0                                     | 0.4238                              |
| O-H distance (Å)                                       | 1.0          |                                       |                                     |
| H-O-H angle (°)                                        | 109.47       |                                       |                                     |
| $k_b$ (kJ (mol·Å <sup>2</sup> ) <sup>-1</sup> )        | 2319.13      |                                       | For <b>SPCE/F model<sup>2</sup></b> |
| $k_\theta$ (kJ (mol·rad <sup>2</sup> ) <sup>-1</sup> ) | 191.5        |                                       | For <b>SPCE/F model<sup>2</sup></b> |
| <b>TIP4P/2005 model<sup>3</sup></b>                    |              |                                       |                                     |
| O                                                      | 3.1589       | 0.774                                 | 0                                   |
| H                                                      | 0            | 0                                     | 0.5564                              |
| M                                                      | 0            | 0                                     | -1.1128                             |
| O-H distance (Å)                                       | 0.9572       |                                       |                                     |
| H-O-H angle (°)                                        | 104.52       |                                       |                                     |
| O-M distance (Å)                                       | 0.1546       |                                       |                                     |

## Section II. Various properties of water with non-polarisable force fields

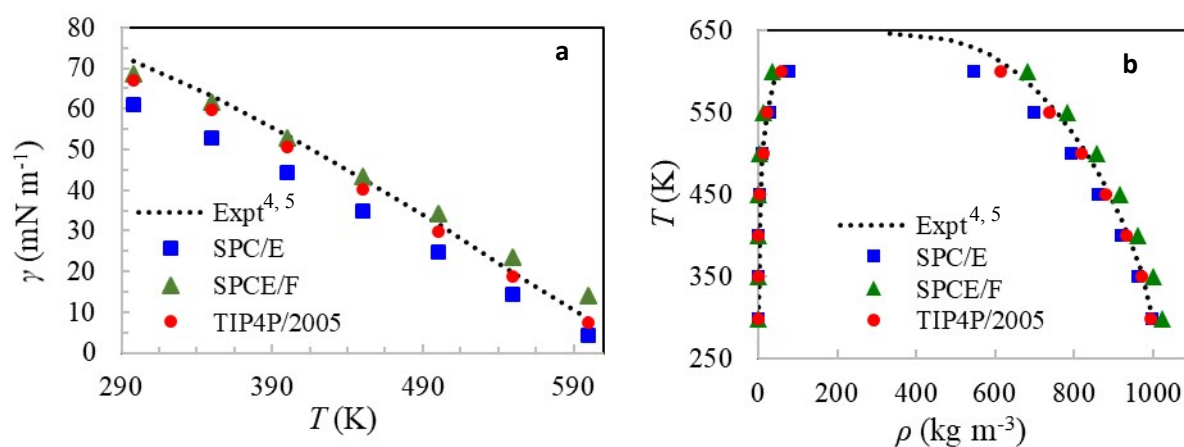

**Figure S1.** a) Values of the surface tension and b) the orthobaric densities of water. The dashed line represents the experimental values<sup>4, 5</sup>, whereas the blue squares, green rectangles and red circles denote the present results with  $N = 2133$  using SPC/E, SPCE/F and TIP4P/2005 models, respectively.

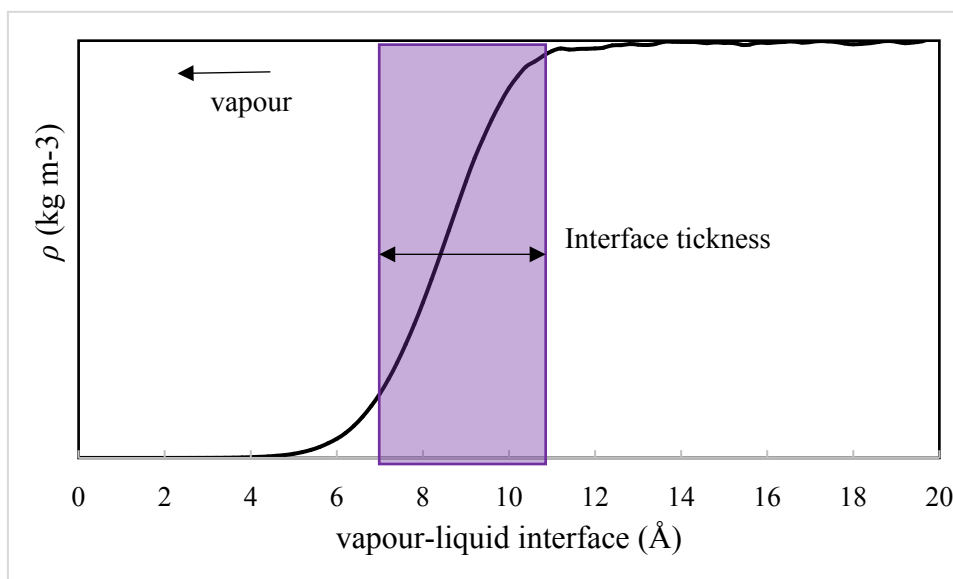

**Figure S2.** A schematic diagram of the density profile across the vapour-liquid interface and thickness of the interface for the SPC/E water model at 350 K.

**Table S2.** Liquid and vapour density, interfacial thickness and surface tension of SPC/E, SPCE/F and TIP4P/2005 water at the temperature range of 298.15 – 600 K. The interfacial thickness was calculated by fitting the hyperbolic tangent function to the density profiles. The numbers in parentheses represent one standard deviation.

| $T$ (K)           | $\rho_{liq}$ (kg m <sup>-3</sup> ) | $\rho_{vap}$ (kg m <sup>-3</sup> ) | $\delta_{10-90}^t$ (Å) | $\gamma$ (mN m <sup>-1</sup> ) |
|-------------------|------------------------------------|------------------------------------|------------------------|--------------------------------|
| <b>SPC/E</b>      |                                    |                                    |                        |                                |
| 298.15            | 996.6 (0.1)                        | 0.0                                | 3.550 (0.008)          | 61.2 (0.1)                     |
| 350               | 963.2 (0.1)                        | 0.11 (0.03)                        | 4.513 (0.007)          | 52.9 (0.1)                     |
| 400               | 918.4 (0.1)                        | 0.62 (0.02)                        | 5.670 (0.008)          | 44.4 (0.1)                     |
| 450               | 861.3 (0.2)                        | 2.8 (0.1)                          | 6.591 (0.022)          | 34.8 (0.2)                     |
| 500               | 791.3 (0.1)                        | 9.4 (0.1)                          | 9.003 (0.012)          | 24.7 (0.1)                     |
| 550               | 699.5 (0.2)                        | 30.7 (1.1)                         | 15.448 (0.018)         | 14.4 (0.2)                     |
| 600               | 546.0 (1.1)                        | 76.8 (0.9)                         | 27.860 (0.044)         | 4.2 (0.2)                      |
| <b>SPCE/F</b>     |                                    |                                    |                        |                                |
| 298.15            | 1025.2 (0.1)                       | 0.0                                | 3.131 (0.021)          | 68.7 (0.2)                     |
| 350               | 999.6 (0.1)                        | 0.0                                | 4.001 (0.006)          | 61.8 (0.1)                     |
| 400               | 961.8 (0.2)                        | 0.21 (0.01)                        | 4.816 (0.006)          | 52.8 (0.2)                     |
| 450               | 915.0 (0.1)                        | 1.3 (0.1)                          | 6.771 (0.008)          | 43.4 (0.1)                     |
| 500               | 857.4 (0.3)                        | 4.4 (0.1)                          | 7.329 (0.008)          | 34.1 (0.2)                     |
| 550               | 783.4 (0.1)                        | 12.2 (0.1)                         | 12.150 (0.029)         | 23.6 (0.2)                     |
| 600               | 683.1 (0.5)                        | 35.0 (0.4)                         | 17.797 (0.027)         | 14.2 (0.2)                     |
| <b>TIP4P/2005</b> |                                    |                                    |                        |                                |
| 298.15            | 995.0 (0.1)                        | 0.0                                | 3.405 (0.008)          | 67.2 (0.1)                     |
| 350               | 970.4 (0.2)                        | 0.0                                | 4.293 (0.009)          | 59.8 (0.1)                     |
| 400               | 932.0 (0.1)                        | 0.61 (0.01)                        | 5.150 (0.009)          | 50.5 (0.1)                     |
| 450               | 881.4 (0.1)                        | 2.4 (0.1)                          | 7.193 (0.008)          | 40.4 (0.2)                     |
| 500               | 818.2 (0.7)                        | 13.2 (1.5)                         | 10.590 (0.045)         | 29.9 (0.2)                     |
| 550               | 737.5 (0.3)                        | 21.4 (0.4)                         | 15.318 (0.039)         | 19.0 (0.1)                     |
| 600               | 614.0 (1.8)                        | 58.9 (0.2)                         | 26.691 (0.051)         | 7.5 (0.1)                      |

### Section III. Coordination numbers and comparison of OPLS and OPLS/ECC models

**Table S3.** The calculated coordination numbers ( $CN$ ) for the first minima in  $g(r)$  of Figure 4.

| Concentration<br>(mol kg <sup>-1</sup> ) | First minima                   |         |                                |         |                                |         |                                |         |
|------------------------------------------|--------------------------------|---------|--------------------------------|---------|--------------------------------|---------|--------------------------------|---------|
|                                          | N <sub>n</sub> -O <sub>w</sub> |         | N <sub>n</sub> -H <sub>w</sub> |         | N <sub>a</sub> -O <sub>w</sub> |         | N <sub>a</sub> -H <sub>w</sub> |         |
|                                          | $r$ (Å)                        | $CN(r)$ |
| 0.65                                     | 5.10                           | 16.17   | 3.25                           | 6.20    | 3.75                           | 6.67    | 4.45                           | 21.53   |
| 2.5                                      | 5.10                           | 14.67   | 3.25                           | 5.55    | 3.75                           | 6.04    | 4.45                           | 19.85   |
| 4.1                                      | 5.10                           | 13.57   | 3.25                           | 5.12    | 3.75                           | 5.60    | 4.45                           | 18.55   |
| 5.9                                      | 5.10                           | 12.52   | 3.25                           | 4.72    | 3.75                           | 5.18    | 4.45                           | 17.23   |
| 13.6                                     | 5.10                           | 9.57    | 3.25                           | 3.59    | 3.75                           | 3.97    | 4.45                           | 13.40   |
| 18.7                                     | 5.10                           | 8.50    | 3.25                           | 3.20    | 3.75                           | 3.55    | 4.45                           | 11.95   |

#### RDF using OPLS and OPLS/ECC models

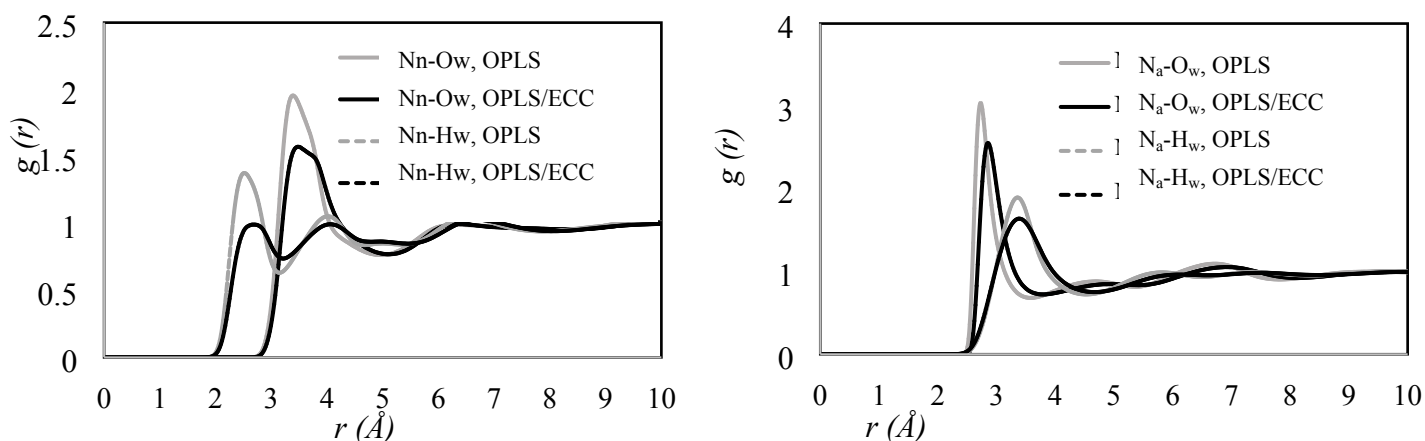

**Figure S3.** Nitrogen of ions-water radial distribution functions for 18.7 mol kg<sup>-1</sup> AN solution using the OPLS and OPLS/ECC models and the TIP4P/2005 force field for water at 298.15 K.

#### Section IV. Experimental values of surface tension of AN solutions

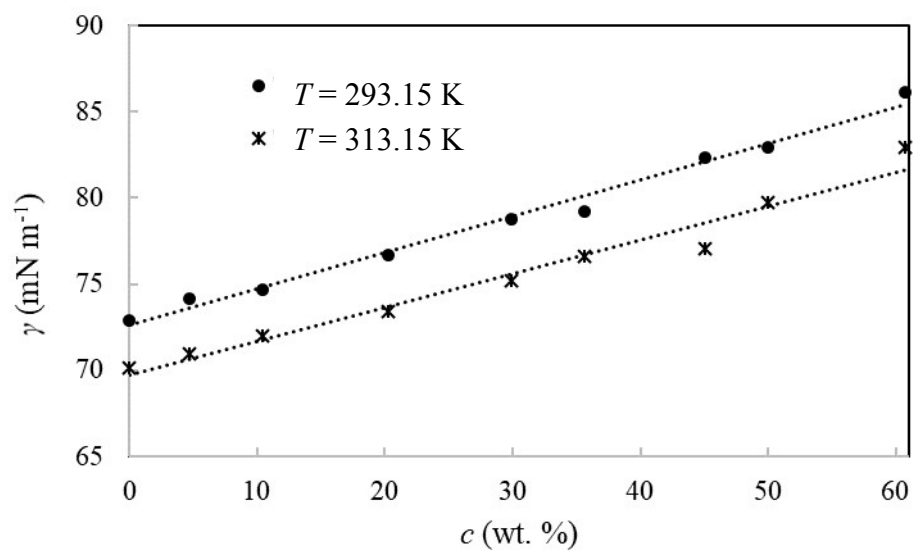

**Figure S4.** Experimental values of surface tension of AN solutions at temperatures of 293.15 K and 313.15 K.<sup>6</sup>

**Section V. RDF and snapshots of coordination shell around one nitrogen of nitrate in the bulk and at the interface of the slab**

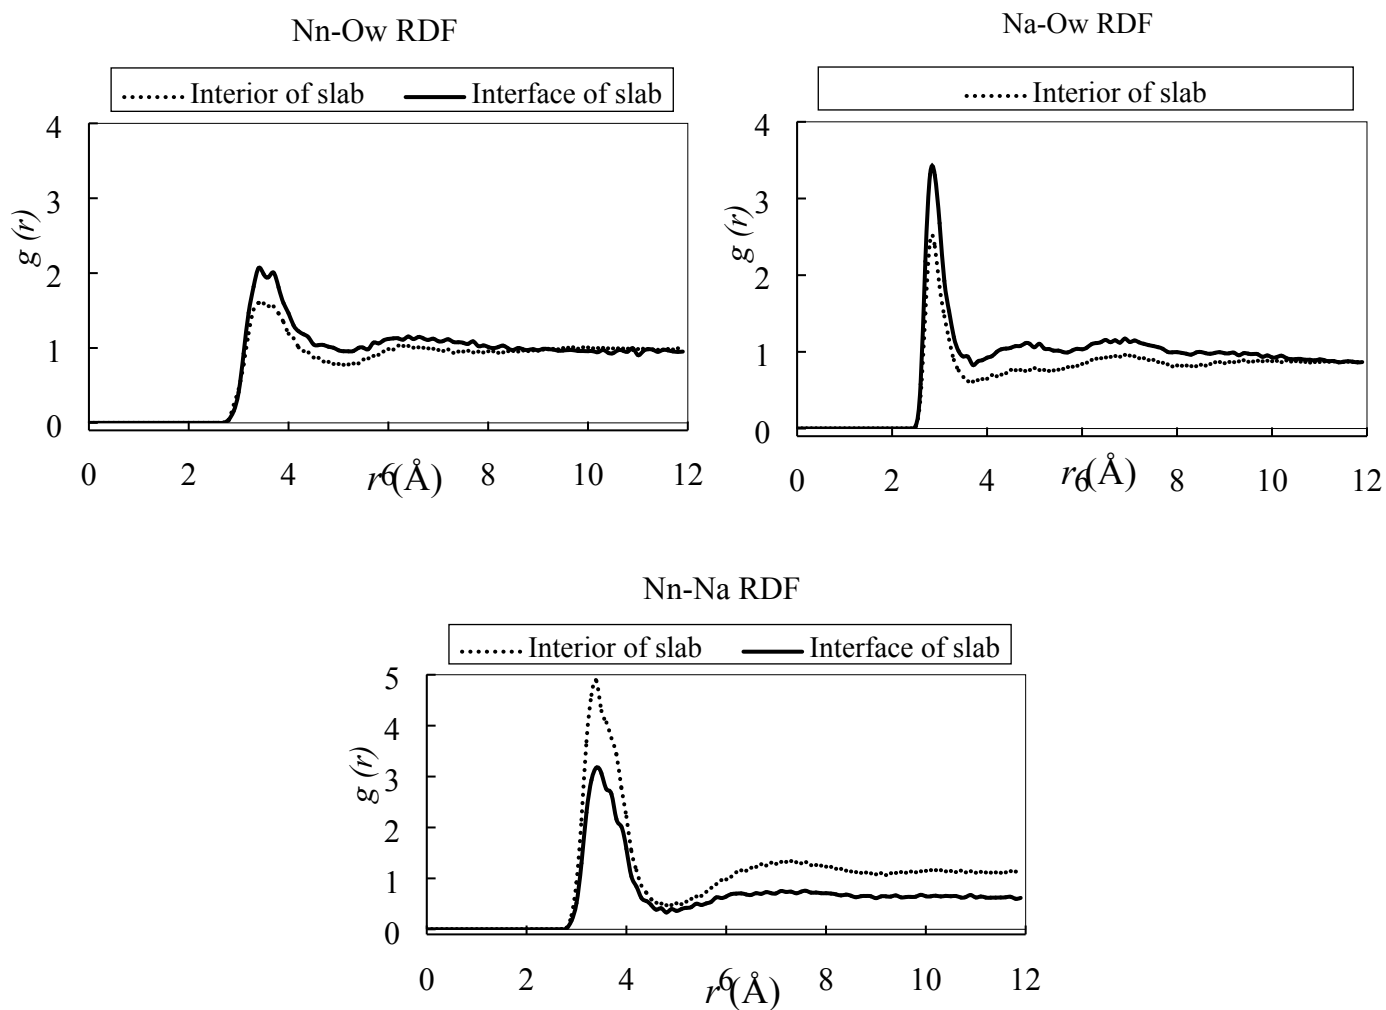

**Figure S5.** Radial distribution functions for the molality of AN solution of  $18.7 \text{ mol kg}^{-1}$ , for the OPLS/ECC model for the ions and the TIP4P/2005 model for water at  $298.15 \text{ K}$ ;  $N_n$  and  $N_a$  denote nitrogen atoms in nitrate and ammonium ions and  $O_w$  signifies the oxygen atoms in water.

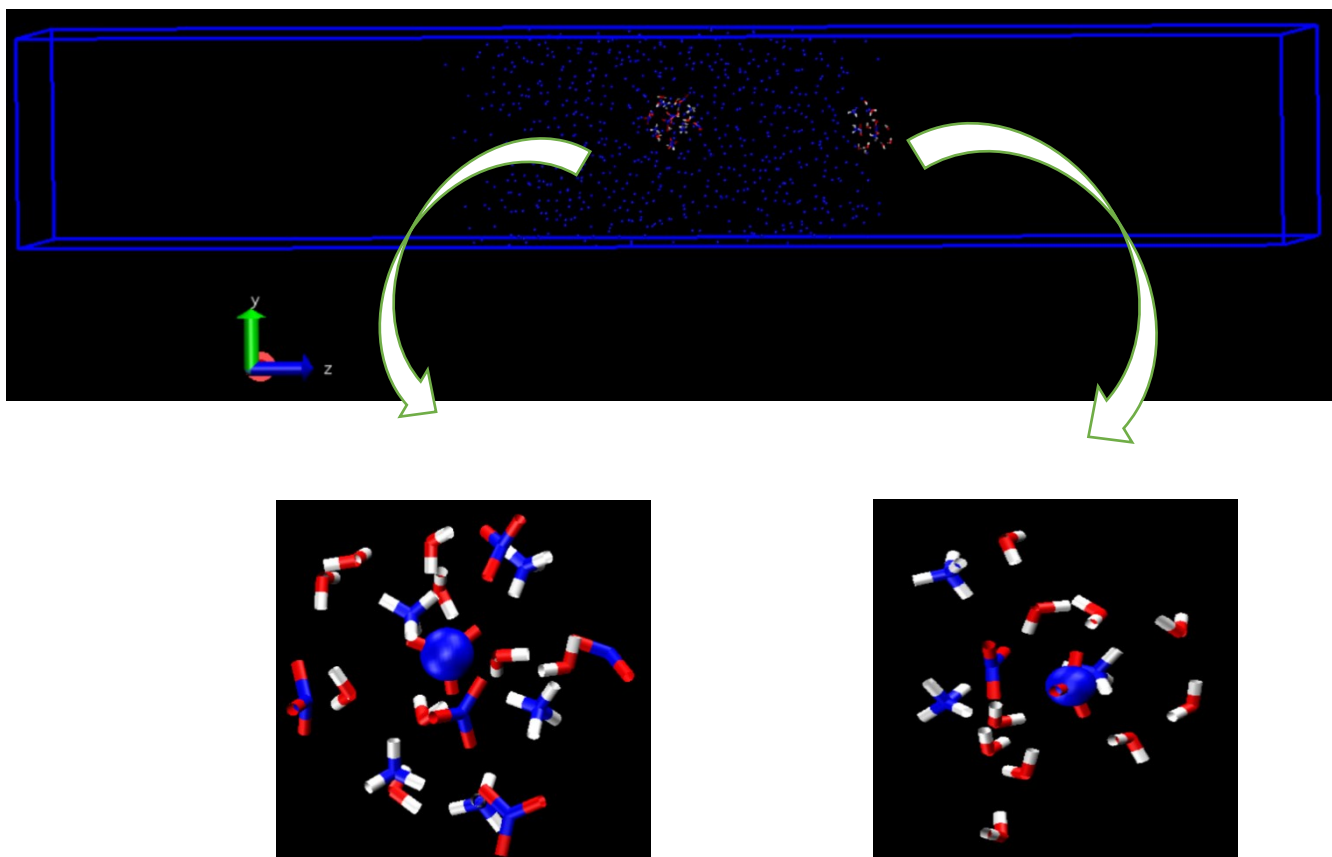

**Figure S6.** Solvation shells around nitrogen atoms in a nitrate anion (all water molecules and ions are within 5.1 Å of the target nitrogen atom) in the bulk and at the interface for the AN molality of 18.7 mol kg<sup>-1</sup>. The water molecules, nitrate anions and ammonium cations are illustrated in red – white, blue – red and blue – white, respectively.



## Section VI. Lammmps code for calculating surface tension-Part 1

```
units          real
atom_style     full
dimension      3
boundary       p p f

pair_style     lj/long/tip4p/long long long 6 2 2 2 0.1546 12
kspace_style   ppm/disp/tip4p 1e-4
kspace_modify force/disp/real 0.0001
kspace_modify force/disp/kspace 0.002
kspace_modify slab 3.0

bond_style     harmonic
angle_style    harmonic
improper_style cvff

special_bonds  lj/coul 0.0 0.0 0.5

read_data      0-65.data

pair_coeff 1 1 0 0
pair_coeff 1 2 0 0
pair_coeff 1 3 0 0
pair_coeff 1 4 0 0
pair_coeff 1 5 0 0
pair_coeff 1 6 0 0
pair_coeff 2 2 0 0
pair_coeff 2 3 0 0
pair_coeff 2 4 0 0
pair_coeff 2 5 0 0
pair_coeff 2 6 0 0
pair_coeff 3 3 0.17 3.25
pair_coeff 3 4 0.17 3.19961
pair_coeff 3 5 0.188944 3.04877
pair_coeff 3 6 0.177437 3.20413
pair_coeff 4 4 0.17 3.15
pair_coeff 4 5 0.188944 3.0015
pair_coeff 4 6 0.177437 3.15445
pair_coeff 5 5 0.21 2.86
pair_coeff 5 6 0.197211 3.00574
pair_coeff 6 6 0.1852 3.1589

set type 1 charge 0.2625
```

```
set type 2 charge 0.5564
set type 3 charge -0.3
set type 4 charge 0.5955
set type 5 charge -0.4485
set type 6 charge -1.1128
```

```
group nitrate type 4 5 # Nn On
group ammonium type 1 3 # Ha Na
group water type 2 6 # Hw Ow
```

```
# neighbor skin
neighbor 2.0 bin
neigh_modify every 1 delay 0 check yes
```

```
compute pe all pe
compute ke all ke
compute 1 all chunk/atom bin/1d z center 0.2 units box
```

```
fix 23 water ave/chunk 1 500000 1000000 13 density/mass density/number file
density_water.txt
fix 2 all ave/chunk 1 500000 1000000 1 density/mass density/number file
density_all.txt
```

```
thermo 1000
thermo_style multi
#-----Energy minimization-----
#min_style cg
minimize 1.0e-8 1.0e-8 5000 10000
fix 3 all shake 0.0001 20 0 b 2 a 2
fix walls all wall/reflect zlo 40.5 zhi 82.5 units box
```

```
thermo 1000
thermo_style custom step spcpu temp density press ke pe etotal lx ly lz
dump 1 all custom 10000 traj.lammpstrj id mol type mass q xu yu zu ix iy iz vx vy vz
dump_modify 1 sort id
restart 1000000 ANwater.restart
#
#-----Initial velocity-----
velocity all create 298.15 123456 dist gaussian
#
#-----Equilibrium-----
fix 5 all npt temp 298.15 298.15 100.0 x 1.0 1.0 1000.0 y 1.0 1.0 1000.0 couple xy
timestep 1
run 500000
```

```
write_data npt_wall_1run.data
write_coeff pair.coeff
```

## Lammps code for calculating surface tension-Part 2

```
units          real
atom_style     full
dimension      3
boundary       p p p

pair_style     lj/long/tip4p/long long long 6 2 2 2 0.1546 12
kspace_style   ppm/disp/tip4p 1e-6
kspace_modify force/disp/real 0.0001
kspace_modify force/disp/kspace 0.002
#kspace_modify slab 3.0

bond_style     harmonic
angle_style    harmonic
improper_style cvff

special_bonds  lj/coul 0.0 0.0 0.5

read_data      npt_wall_1run.data

pair_coeff 1 1 0 0
pair_coeff 1 2 0 0
pair_coeff 1 3 0 0
pair_coeff 1 4 0 0
pair_coeff 1 5 0 0
pair_coeff 1 6 0 0
pair_coeff 2 2 0 0
pair_coeff 2 3 0 0
pair_coeff 2 4 0 0
pair_coeff 2 5 0 0
pair_coeff 2 6 0 0
pair_coeff 3 3 0.17 3.25
pair_coeff 3 4 0.17 3.19961
pair_coeff 3 5 0.188944 3.04877
pair_coeff 3 6 0.177437 3.20413
pair_coeff 4 4 0.17 3.15
pair_coeff 4 5 0.188944 3.0015
pair_coeff 4 6 0.177437 3.15445
pair_coeff 5 5 0.21 2.86
pair_coeff 5 6 0.197211 3.00574
pair_coeff 6 6 0.1852 3.1589
```

```
set type 1 charge 0.2625
set type 2 charge 0.5564
set type 3 charge -0.3
set type 4 charge 0.5955
set type 5 charge -0.4485
set type 6 charge -1.1128
```

```
group nitrate type 4 5 # Nn On
group ammonium type 1 3 # Ha Na
group water type 2 6 # Hw Ow
group oxygen type 6 #Owater
```

```
# neighbor skin
neighbor 2.0 bin
neigh_modify every 1 delay 0 check yes
```

```
compute pe all pe
compute ke all ke
compute 1 all chunk/atom bin/1d z center 0.2 units box
```

```
fix 23 water ave/chunk 1 1000000 1000000 13 density/mass density/number file
density_water.txt
fix 21 nitrate ave/chunk 1 1000000 1000000 11 density/mass density/number file
density_nitrate.txt
fix 22 ammonium ave/chunk 1 1000000 1000000 12 density/mass density/number
file density_ammonium.txt
fix 2 all ave/chunk 1 1000000 1000000 1 density/mass density/number file
density_all.txt
fix 24 oxygen ave/chunk 1 1000000 1000000 14 density/mass density/number file
density_oxygen.txt
```

```
# Set up pressure tensor components
# c_thermo_press[1] is the XX component of the pressure tensor
variable xPress equal c_thermo_press[1]
variable yPress equal c_thermo_press[2]
variable zPress equal c_thermo_press[3]
```

```
# Computes the symmetric per-atom stress tensor
compute CC2 all chunk/atom bin/1d z center 0.5 units box
compute stpa all stress/atom NULL
fix stress all ave/chunk 1 1000000 1000000 CC2 c_stpa[1] c_stpa[2] c_stpa[3] &
c_stpa[4] c_stpa[5] c_stpa[6] file "out.stress.zProfile.txt"
```

```
# Compute surface tension
```

```

variable A_in_m equal 1e-10 # Angstrom in meter
variable atm_in_Pa equal 101325 # note: 1 Pa = 1 N/m^2
variable N_in_mN equal 1e3 # Newton in milliNewton
variable convFac equal ${A_in_m}*${atm_in_Pa}*${N_in_mN}
# lz is the box length in the z-dimension
variable st equal 0.5*lz*(v_zPress-0.5*(v_xPress+v_yPress))*${convFac} # in mN/m
fix st all ave/time 1 500 500 v_st file "out.surfTension.txt"
fix staverage all ave/time 1 500 500 v_st file "out.AVesurfTension.txt" ave running

```

```

thermo 1000
thermo_style multi
#-----Energy minimization-----
#min_style cg
minimize 1.0e-8 1.0e-8 5000 10000
fix 3 all shake 0.0001 20 0 b 2 a 2
#fix walls all wall/reflect zlo 69.5 zhi 140.5 units box

```

```

thermo 1000
thermo_style custom step spcpu temp density press ke pe etotal lx ly lz pxx pyy pzz
dump 1 all custom 10000 traj.lammpstrj id mol type mass q xu yu zu ix iy iz vx vy vz
dump_modify 1 sort id
restart 1000000 ANwater.restart
#
#-----Initial velocity-----
#velocity all create 298.15 123456 dist gaussian
#
#-----Equilibrium-----
fix 5 all nvt temp 298.15 298.15 100.0
timestep 1
run 20000000
write_data nvt_final_1.data
write_coeff pair.coeff

```

## References

1. Berendsen, H. J. C.; Grigera, J. R.; Straatsma, T. P., The Missing Term in Effective Pair Potentials. *J. Phys. Chem.* **1987**, *91* (24), 6269-6271.
2. Lopez-Lemus, J.; Chapela, G. A.; Alejandre, J., Effect of Flexibility on Surface Tension and Coexisting Densities of Water. *J. Chem. Phys.* **2008**, *128* (17), 174703.
3. Abascal, J. L.; Vega, C., A General Purpose Model for The Condensed Phases of Water: TIP4P/2005. *J. Chem. Phys.* **2005**, *123* (23), 234505.
4. Vargaftik, N. B.; Volkov, B. N.; Voljak, L. D., International Tables of the Surface Tension of Water. *J. Phys. Chem. Ref. Data* **1983**, *12* (3), 817-820.
5. Green, D. W.; Perry, R. H., *Perry's Chemical Engineers' Handbook* 8<sup>th</sup> ed.; McGraw-Hill: 2008.
6. Abramzon, A. A.; Gauberk, R. D., Surface Tension of Salt Solutions. *Russ. J. Appl. Chem.* **1993**, *66* (8), 1474.
